# Supplementary material for: Diabetic Peripheral Neuropathy Is Associated With Increased Arterial Stiffness Without Changes in Carotid Intima–Media Thickness in Type 2 Diabetes
Source: PubMed Central journal article supplement — Diabetes Care. 2011 May 20;34(6):1403–5. doi: 10.2337/dc10-2222 (PMC3114324; doi:10.2337/dc10-2222), 2011-05-20
Supplement: supp_dc10-2222v102222_DC102222SupplementaryData1.pdf [file supp_dc10-2222v102222_DC102222SupplementaryData1.pdf]

Online Appendix Table A1. Characteristics of subjects with and without diabetic peripheral neuropathy

|                                       | Without neuropathy | With neuropathy | <i>P</i> |
|---------------------------------------|--------------------|-----------------|----------|
| N                                     | 604                | 127             |          |
| Age (years)                           | 57.0 ± 11.1        | 59.8 ± 11.5     | 0.010    |
| Gender (male %)                       | 51.3               | 45.7            | 0.247    |
| Duration of diabetes (years)          | 8.9 ± 8.3          | 12.6 ± 10.1     | <0.001   |
| Height (cm)                           | 162.5 ± 8.6        | 161.2 ± 8.7     | 0.148    |
| BMI (kg/m <sup>2</sup> )              | 24.6 ± 3.3         | 23.7 ± 3.3      | 0.009    |
| Waist circumference (cm)              | 86.0 ± 9.0         | 85.2 ± 8.4      | 0.406    |
| HbA1c (%)                             | 8.0 ± 2.0          | 8.0 ± 2.0       | 0.953    |
| Fasting glucose (mg/dL)               | 148.9 ± 59.5       | 145.7 ± 65.7    | 0.588    |
| Total cholesterol (mg/dL)             | 168.7 ± 37.8       | 165.2 ± 40.0    | 0.353    |
| Triglyceride (mg/dL)                  | 135.9 ± 90.7       | 136.5 ± 88.7    | 0.942    |
| HDL cholesterol (mg/dL)               | 51.8 ± 13.9        | 47.5 ± 10.5     | <0.001   |
| LDL cholesterol (mg/dL)               | 89.6 ± 33.4        | 90.6 ± 33.1     | 0.768    |
| Systolic BP (mmHg)                    | 131.7 ± 17.8       | 135.4 ± 17.5    | 0.034    |
| Diastolic BP (mmHg)                   | 83.0 ± 10.1        | 83.8 ± 8.7      | 0.361    |
| Pulse pressure (mmHg)                 | 48.7 ± 12.4        | 51.6 ± 13.9     | 0.020    |
| GFR (mL/min per 1.73 m <sup>2</sup> ) | 82.6 ± 21.6        | 77.1 ± 24.3     | 0.012    |
| Hyperlipidemia (%)                    | 81.6               | 81.1            | 0.891    |
| CVD (%)                               | 7.8                | 13.4            | 0.042    |
| Current smokers (%)                   | 5.2                | 5.5             | 0.912    |
| Antihypertensive drugs                | 53.0               | 52.8            | 0.963    |

|                                              |               |                |        |
|----------------------------------------------|---------------|----------------|--------|
| ACEI/ARB                                     | 45.4          | 38.6           | 0.162  |
| Calcium channel blocker                      | 22.7          | 18.9           | 0.350  |
| Beta blocker                                 | 10.9          | 9.5            | 0.624  |
| Insulin therapy (%)                          | 37.4          | 44.1           | 0.160  |
| Autonomic neuropathy (%)                     | 20.9          | 25.0           | 0.324  |
| Normo-/micro-/macroalbuminuria (%)           | 74.7/19.5/5.8 | 59.8/21.6/18.6 | <0.001 |
| Retinopathy (%)<br>(no/simple/proliferative) | 74.4/16.1/9.5 | 53.4/27.1/19.5 | <0.001 |

---

Data are means±SD or percentage. BMI, body mass index; HDL, high-density lipoprotein; LDL, low-density lipoprotein; BP, blood pressure; GFR, glomerular filtration rate; CVD, cardiovascular disease; ACEI/ARB, angiotensin-converting enzyme inhibitor/angiotensin II receptor blocker.

Online Appendix Table A2. Odds ratios (ORs) and 95% confidence intervals (CIs) for abnormal cardio-ankle vascular index (CAVI) in all subjects with diabetic peripheral neuropathy (DPN) and stratified according to categorized age, body mass index (BMI), diabetes duration, or hypertension.

|                        | <i>n</i> | DPN<br>(%) | Unadjusted       |          | Multivariate adjusted* |          |
|------------------------|----------|------------|------------------|----------|------------------------|----------|
|                        |          |            | OR (95% CI)      | <i>P</i> | OR (95% CI)            | <i>P</i> |
| Total                  | 731      | 17.4       | 2.96 (1.95–4.50) | <0.001   | 2.54 (1.52–4.26)       | <0.001   |
| Age                    |          |            |                  |          |                        |          |
| < 58 years             | 346      | 12.1       | 2.81 (1.04–7.60) | 0.041    | 4.51 (1.31–15.58)      | 0.017    |
| ≥ 58 years             | 385      | 22.1       | 2.44 (1.49–4.00) | <0.001   | 2.26 (1.27–4.02)       | 0.006    |
| BMI                    |          |            |                  |          |                        |          |
| < 25 kg/m <sup>2</sup> | 426      | 18.5       | 2.90 (1.72–4.89) | <0.001   | 2.52 (1.32–4.82)       | 0.005    |
| ≥ 25 kg/m <sup>2</sup> | 305      | 15.7       | 2.98 (1.47–6.06) | 0.003    | 2.96 (1.14–7.67)       | 0.026    |
| Duration               |          |            |                  |          |                        |          |
| < 6 years              | 292      | 12.3       | 4.07 (1.79–9.24) | 0.001    | 3.69 (1.20–11.32)      | 0.022    |
| ≥ 6 years              | 439      | 20.7       | 2.38 (1.46–3.90) | 0.001    | 2.34 (1.29–4.24)       | 0.005    |
| Hypertension           |          |            |                  |          |                        |          |
| No                     | 301      | 16.0       | 2.91 (1.35–6.28) | 0.007    | 3.24 (1.17–8.97)       | 0.024    |
| Yes                    | 430      | 18.4       | 2.98 (1.78–4.97) | <0.001   | 2.39 (1.29–4.45)       | 0.006    |

\*Adjusted for age, gender, diabetes duration, body mass index, glycosylated hemoglobin, pulse pressure, glomerular filtration rate, hyperlipidemia, cardiovascular disease, and autonomic neuropathy.

An abnormal CAVI was defined as the highest quintile.
